# Supplementary material for: Prevalence of Low Cardiovascular Risk Profile Among Diverse Hispanic/Latino Adults in the United States by Age, Sex, and Level of Acculturation: The Hispanic Community Health Study/Study of Latinos
Source: PubMed Central journal article supplement — J Am Heart Assoc. 2016 Aug 20;5(8):e003929. doi: 10.1161/JAHA.116.003929 (PMC5015308; doi:10.1161/jaha.116.003929), 2016-08-20
Supplement: JAH3-5-e003929-s001.pdf [file JAH3-5-e003929-s001.pdf]

# **SUPPLEMENTAL MATERIAL**

**Table S1. Unweighted Cell Counts Corresponding to Weighted Prevalence in Table 2  
(Age-Stratified Prevalence of LR Status by Sex and Hispanic/Latino Background)**

| Age Group    | Hispanic/Latino Background |       |           |         |              |                  |                |
|--------------|----------------------------|-------|-----------|---------|--------------|------------------|----------------|
|              | ALL                        | Cuban | Dominican | Mexican | Puerto Rican | Central American | South American |
| <b>Men</b>   |                            |       |           |         |              |                  |                |
| 18-44        | 2553                       | 349   | 204       | 1102    | 383          | 333              | 182            |
| 45-74        | 3257                       | 691   | 269       | 1134    | 636          | 296              | 231            |
| <b>Women</b> |                            |       |           |         |              |                  |                |
| 18-44        | 3444                       | 384   | 376       | 1594    | 467          | 407              | 216            |
| 45-74        | 5503                       | 814   | 520       | 2205    | 995          | 588              | 381            |
